# Supplementary material for: Bioactive Phytochemicals of Citrus reticulata Seeds—An Example of Waste Product Rich in Healthy Skin Promoting Agents
Source: MDPI journal article supplement (doi:10.3390/antiox11050984), 2022-05-18
Supplement: s1 [file s1]

## Supplementary Materials

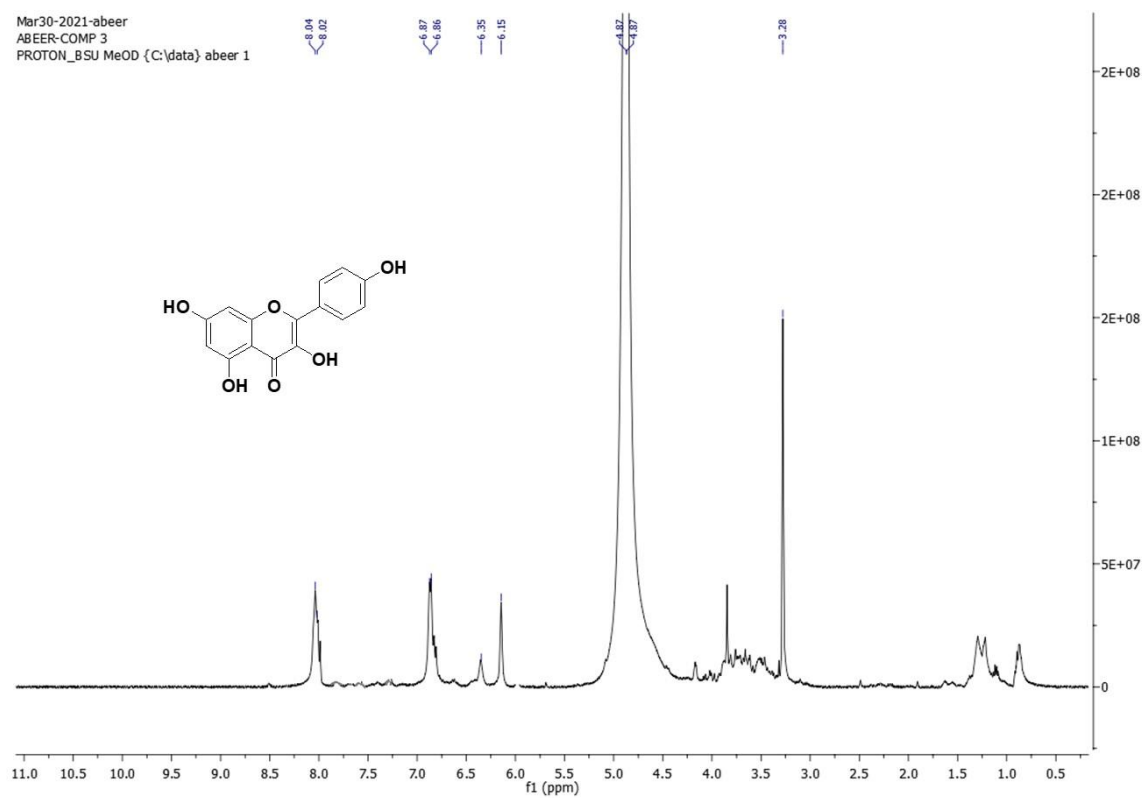

**Figure S1.**  $^1\text{H}$  NMR spectrum of compound **1** measured in  $\text{CD}_3\text{OD}-d_4$  at 400 MHz.

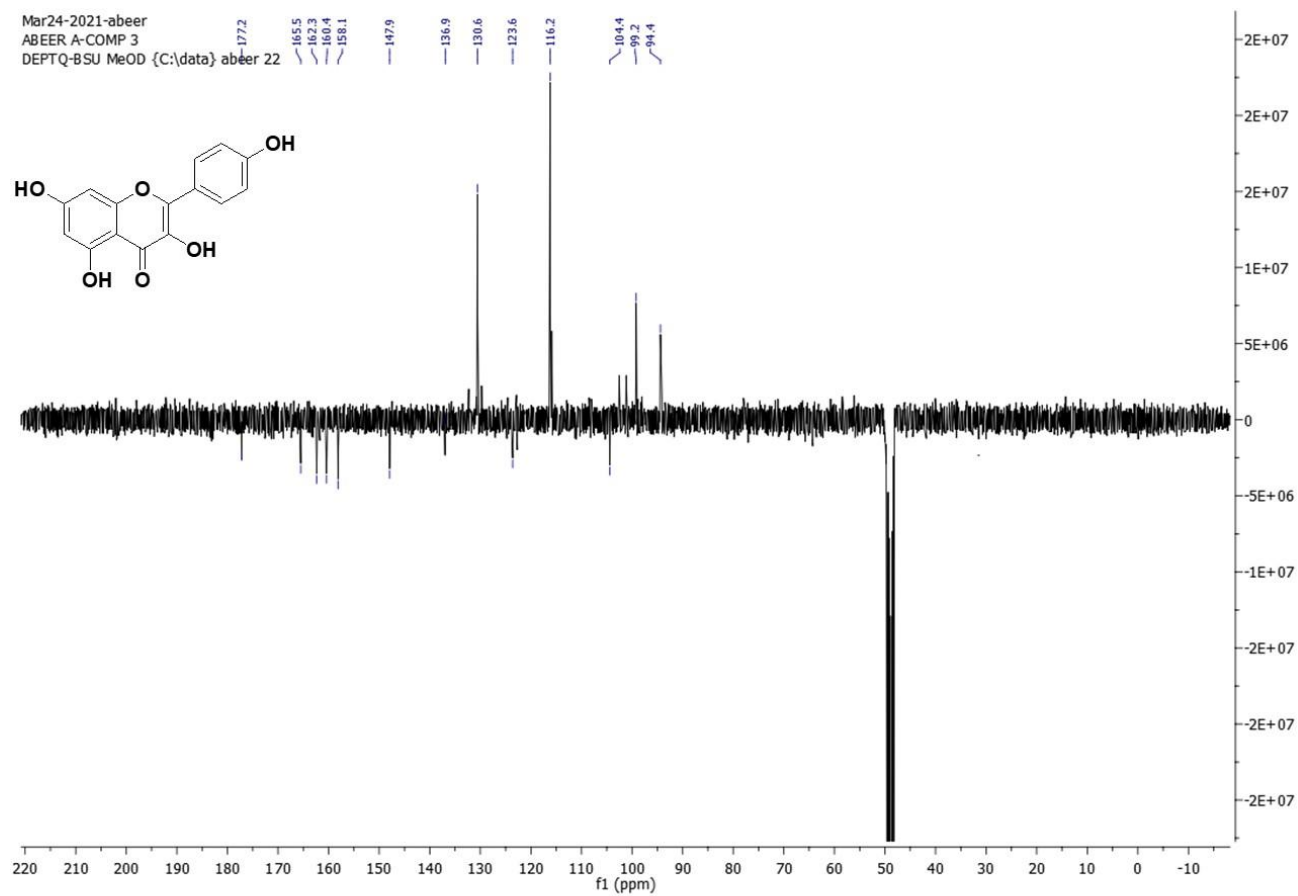

**Figure S2.** DEPT-Q NMR spectrum of compound **1** measured in  $\text{CD}_3\text{OD}-d_4$  at 100 MHz.

Mar23-2021-abeer  
 ABEER A-COMP 5  
 PROTON\_BSU MeOD {C:\data\} abeer 20

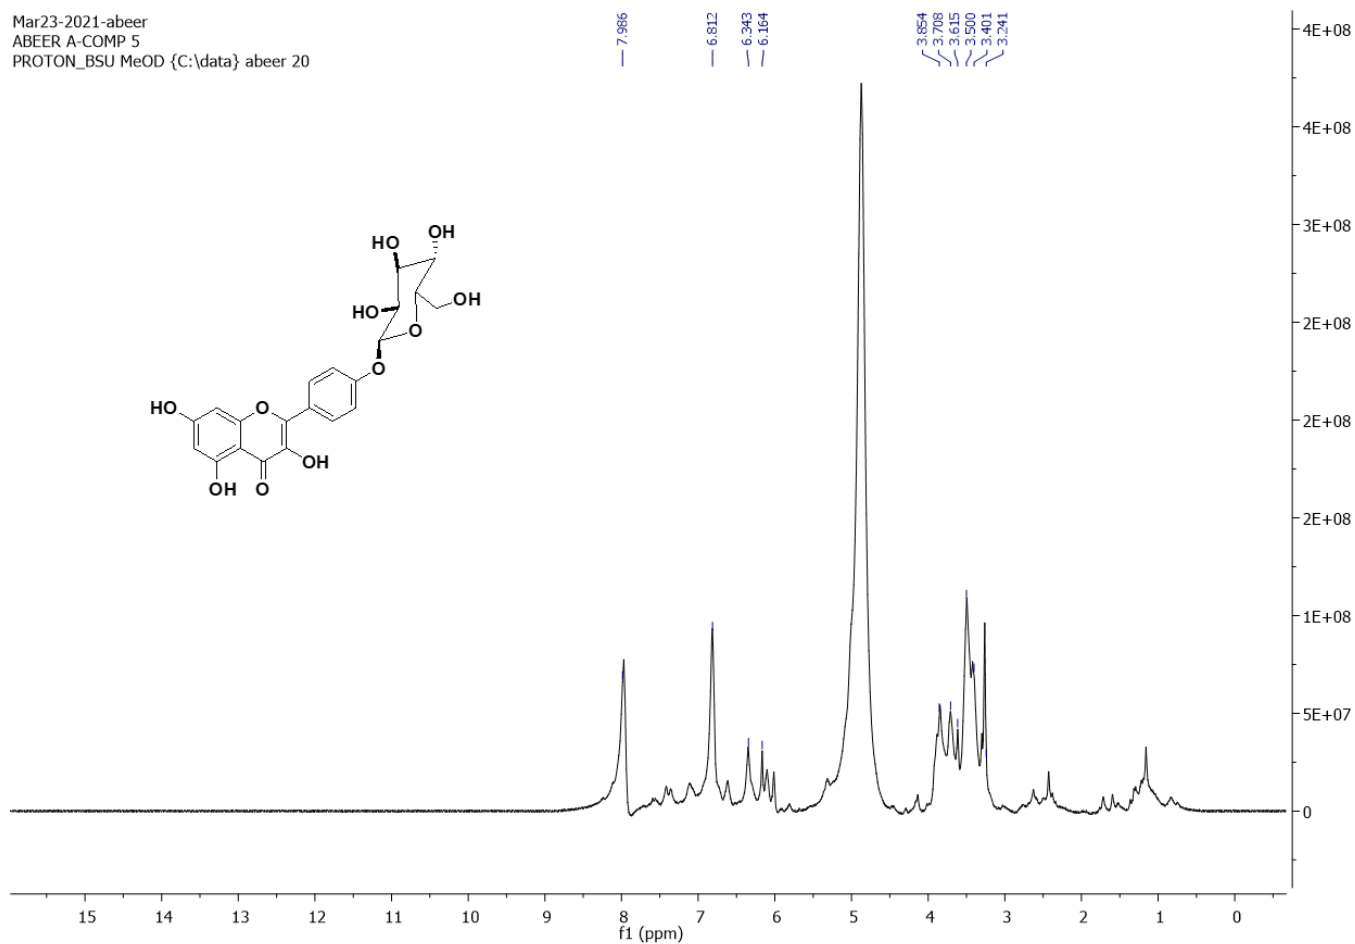

**Figure S3.**  $^1\text{H}$  NMR spectrum of compound **2** measured in  $\text{CD}_3\text{OD}-d_4$  at 400 MHz.

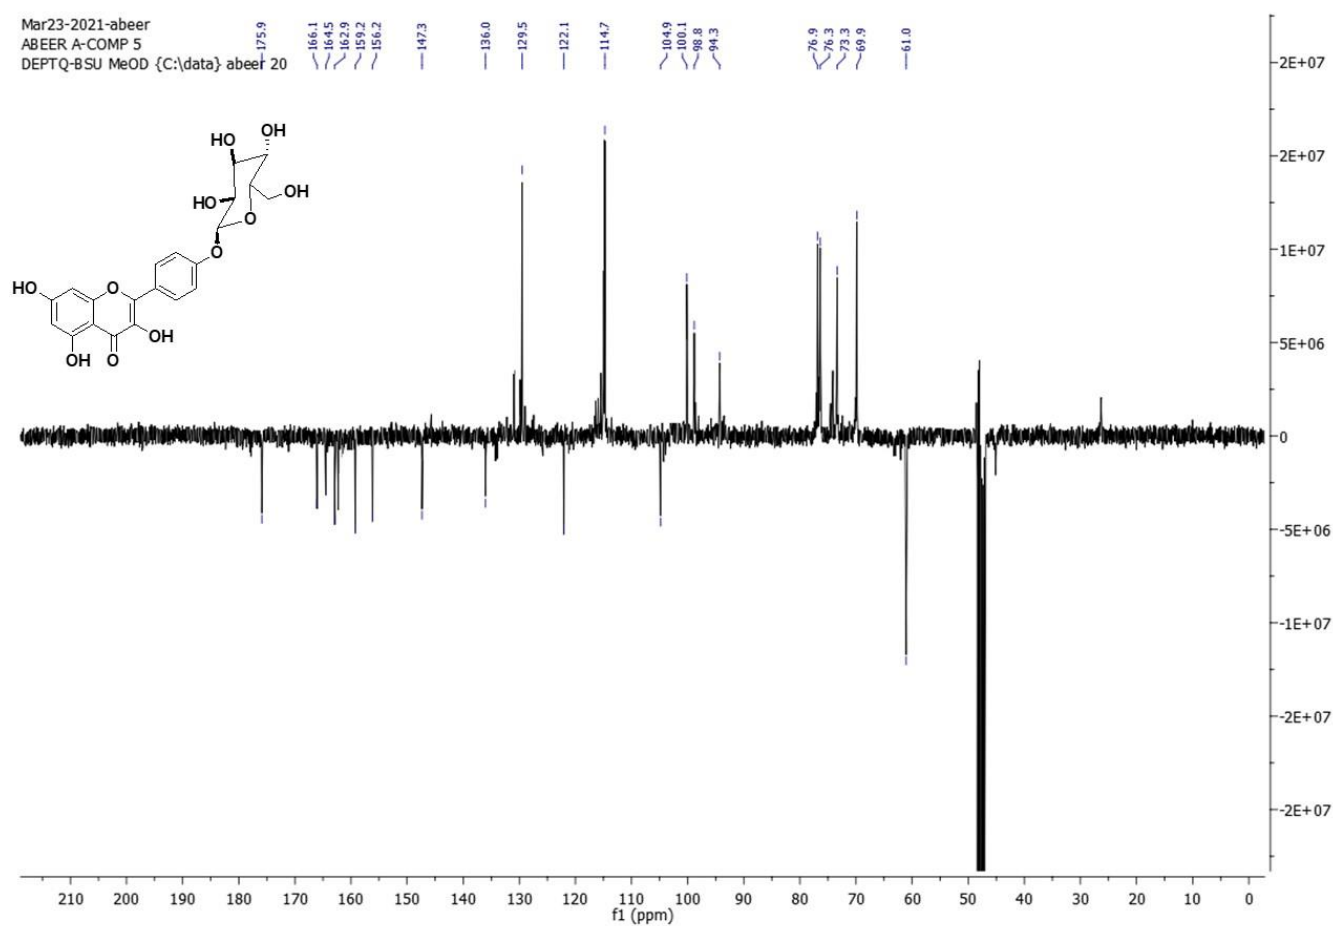

**Figure S4.** DEPT-Q NMR spectrum of compound **2** measured in  $\text{CD}_3\text{OD}-d_4$  at 100 MHz.

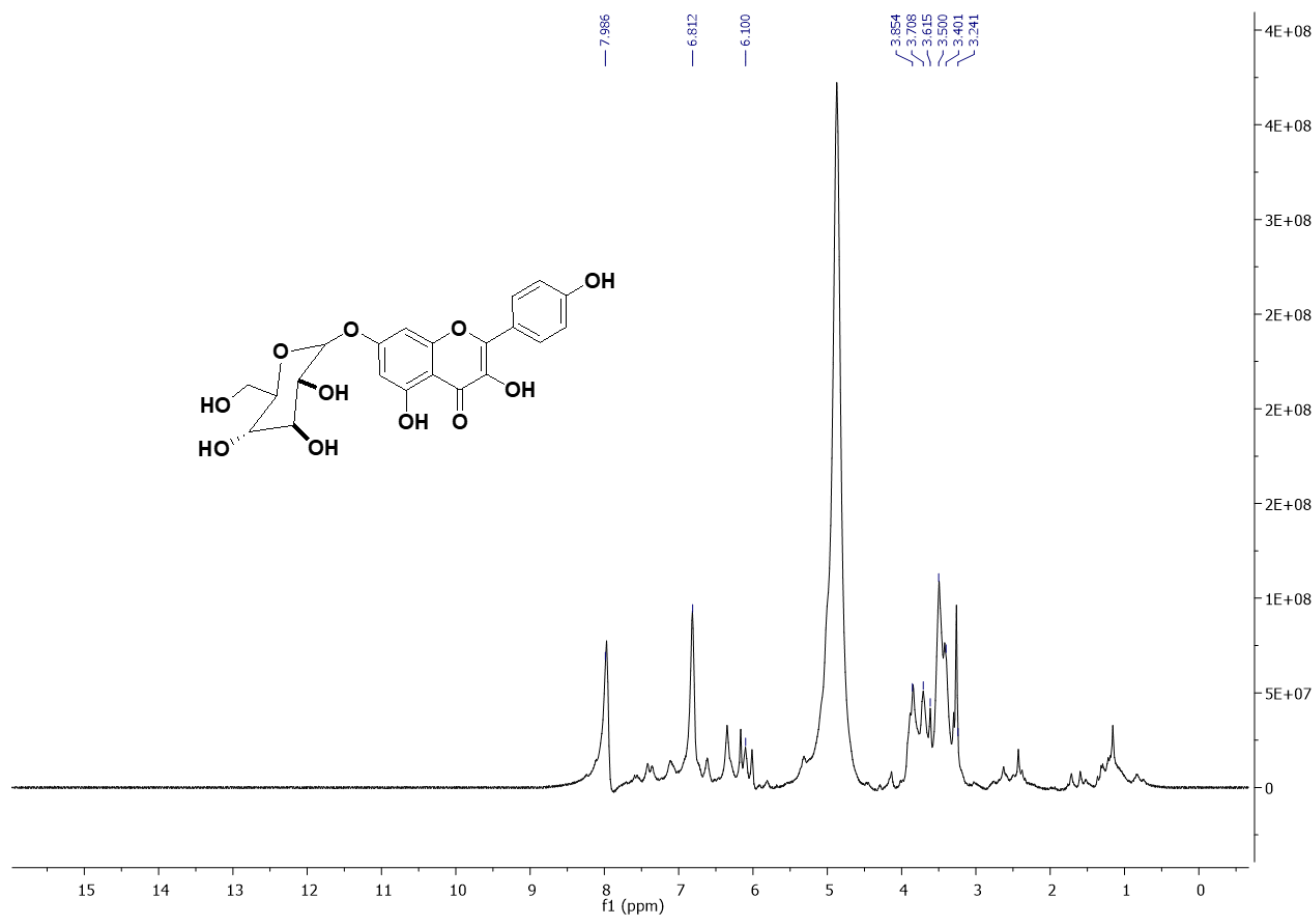

Figure S5. <sup>1</sup>H NMR spectrum of compound 3 measured in CD<sub>3</sub>OD-*d*<sub>4</sub> at 400 MHz.

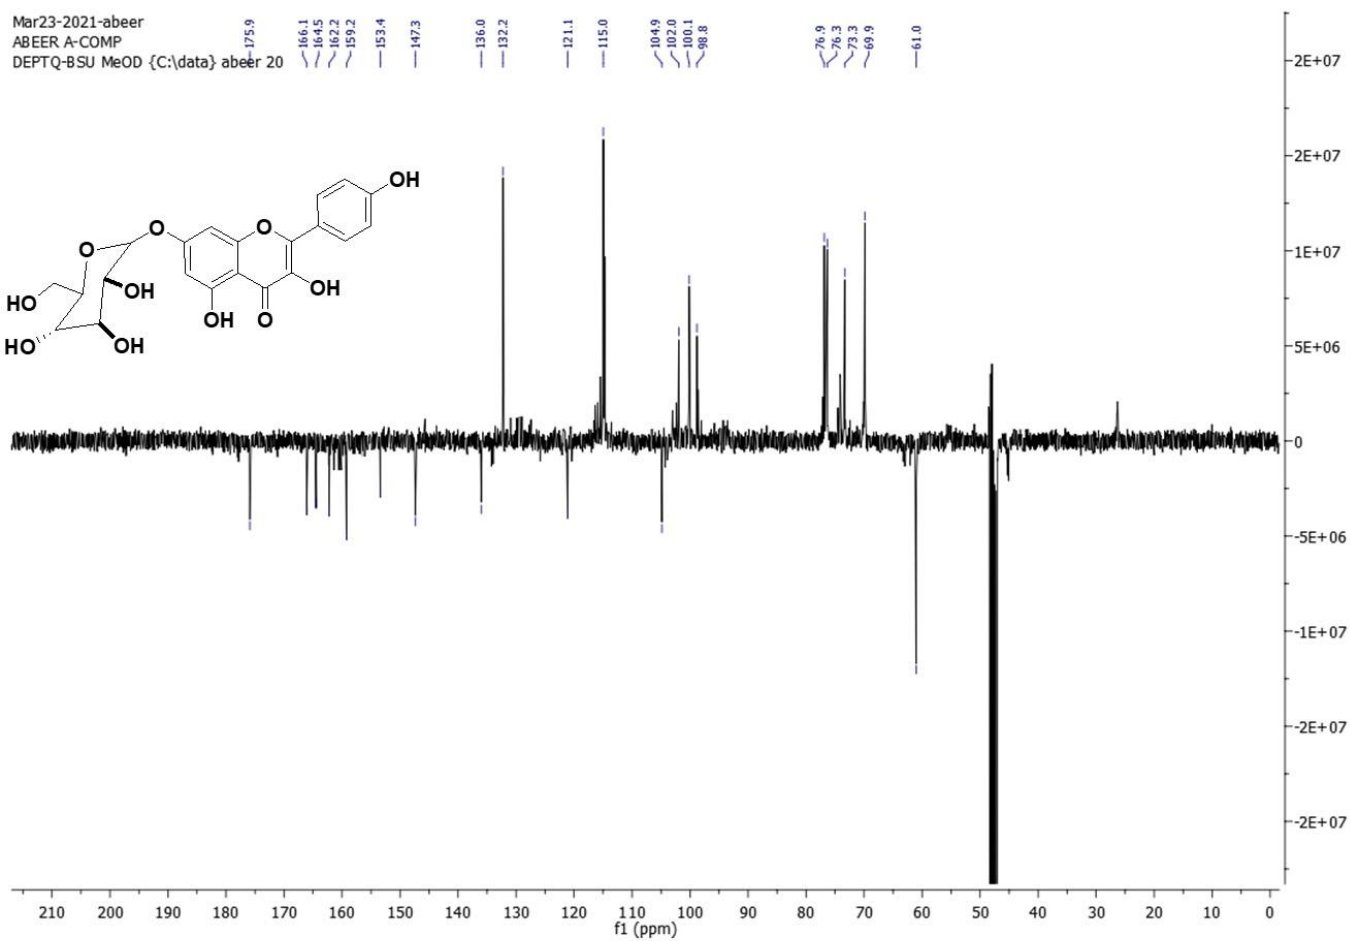

**Figure S6.** DEPT-Q NMR spectrum of compound 3 measured in  $\text{CD}_3\text{OD}-d_4$  at 100 MHz.

Mar24-2021-abeer  
ABEER A-COMP 8  
PROTON\_BSU MeOD {C:\data} abeer 7

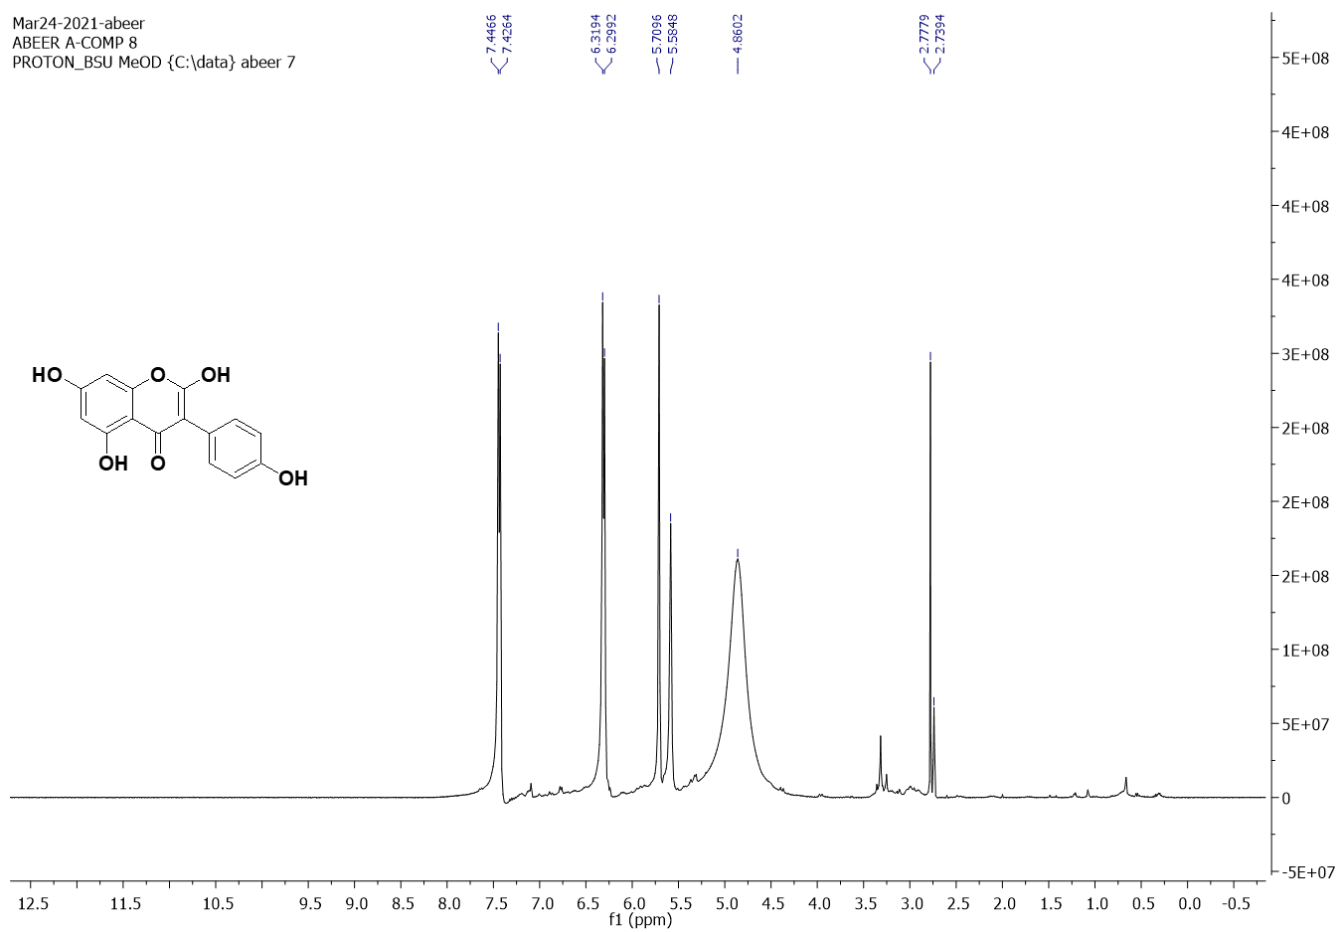

**Figure S7.** <sup>1</sup>H NMR spectrum of compound **4** measured in CD<sub>3</sub>OD-*d*<sub>4</sub> at 400 MHz.

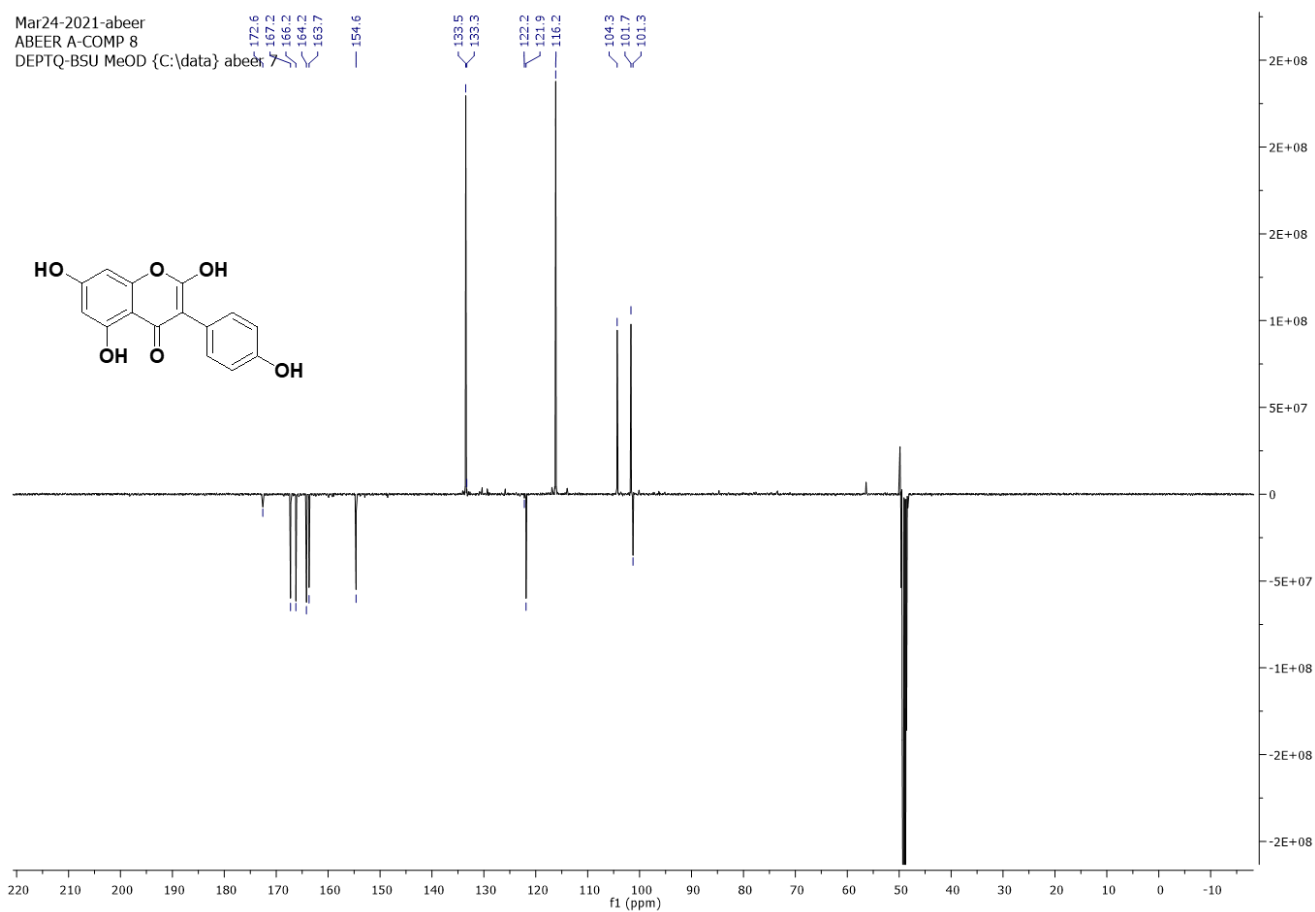

**Figure S8.** DEPT-Q NMR spectrum of compound **4** measured in CD<sub>3</sub>OD-*d*<sub>4</sub> at 100 MHz.



Mar31-2021-abeer  
 ABEER-COMP 11  
 PROTON\_BSUS DMSO {C:\data\abeer 19

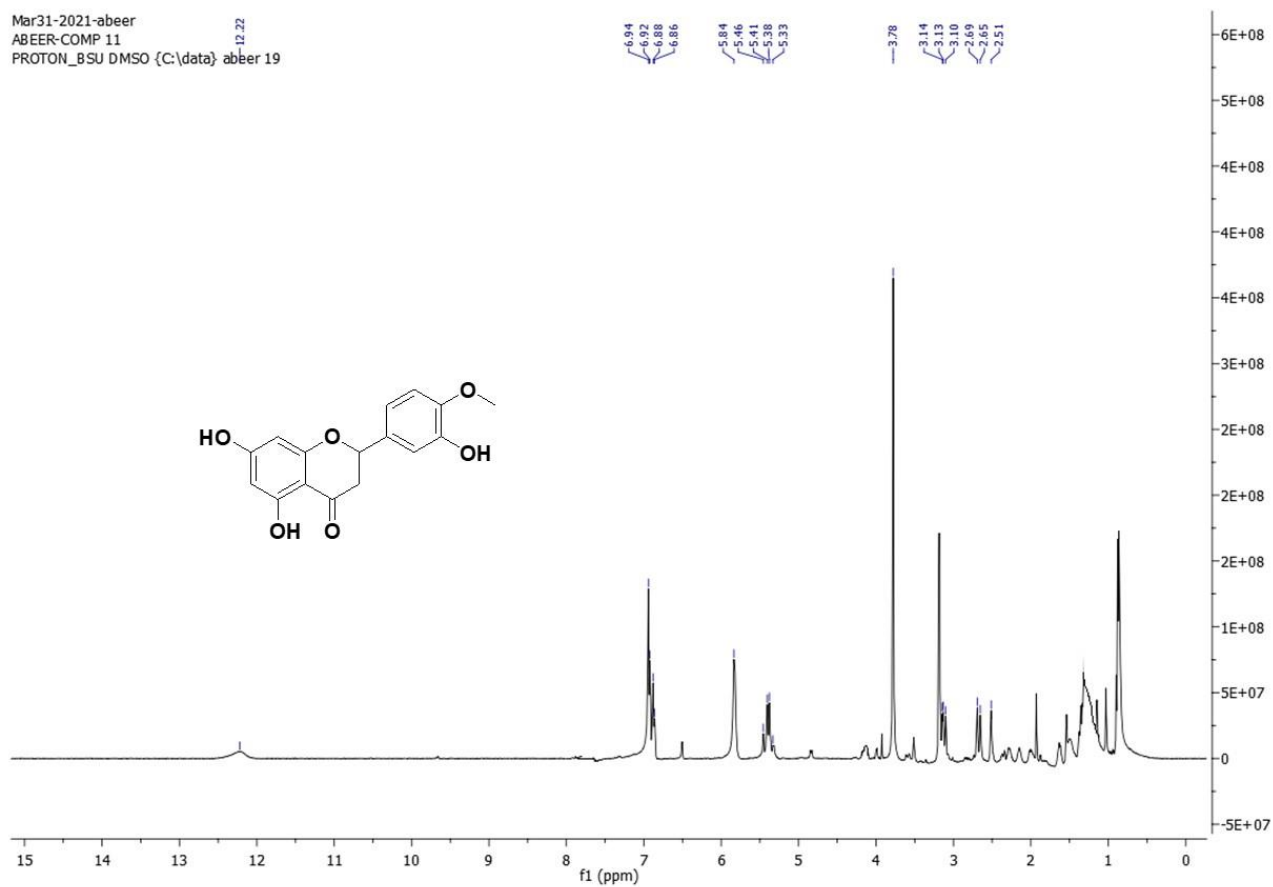

**Figure S9.**  $^1\text{H}$  NMR spectrum of compound **5** measured in  $\text{DMSO-}d_6$  at 400 MHz.

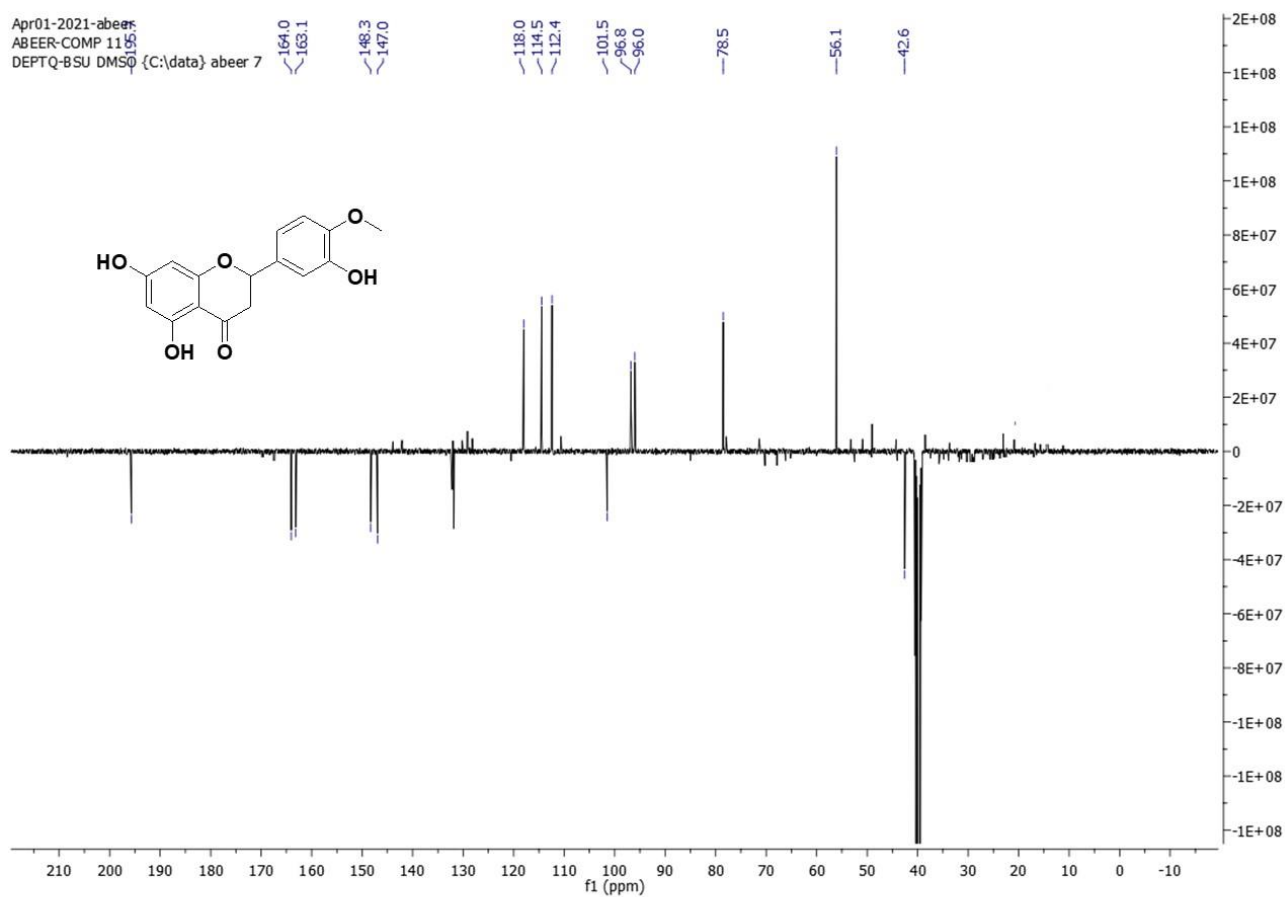

**Figure S10.** DEPT-Q NMR spectrum of compound **5** measured in DMSO- $d_6$  at 100 MHz.

Mar25-2021-abeer  
 ABEER A-COMP 2  
 PROTON\_BSU MeOD {C:\data\} abeer 23

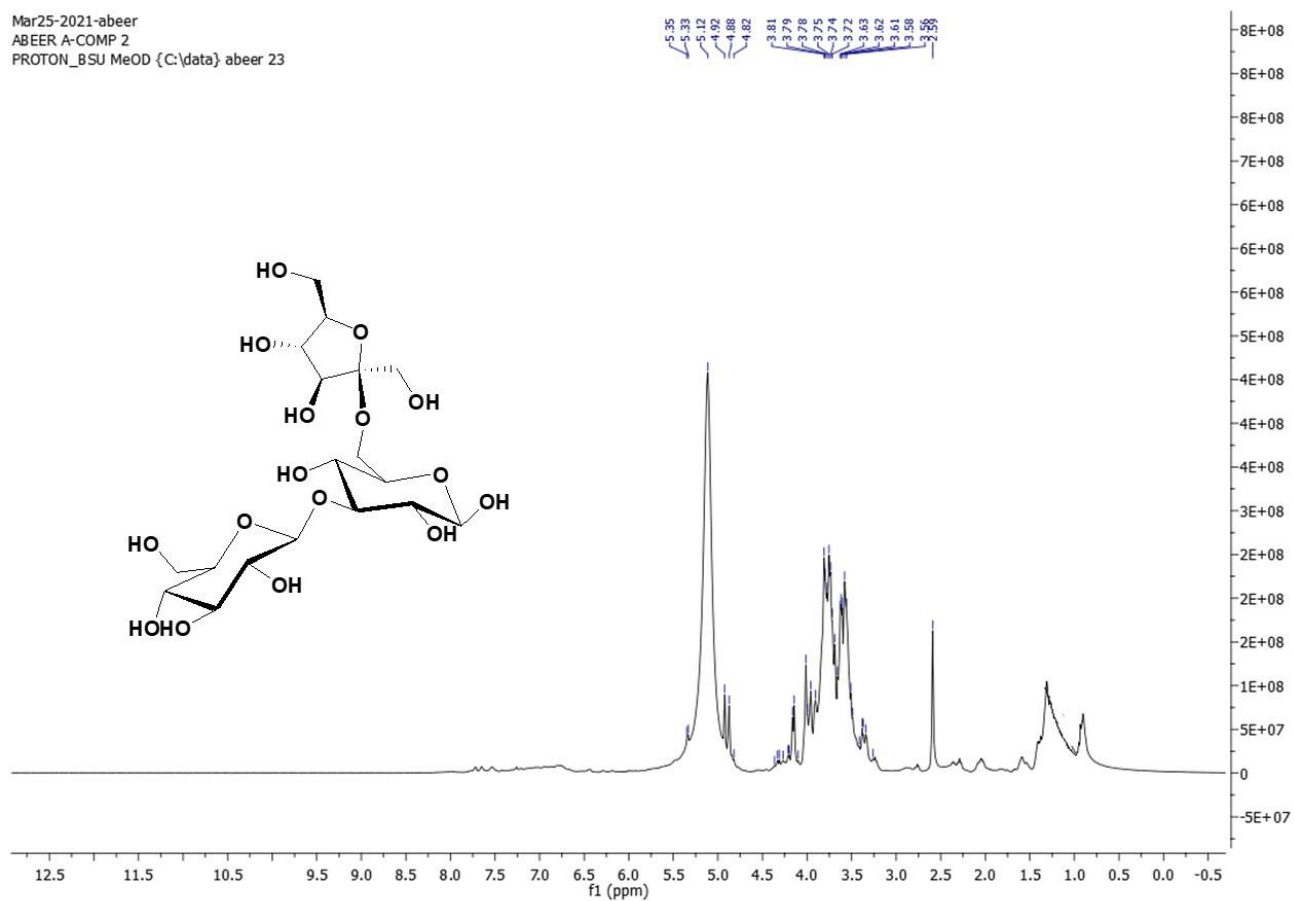

**Figure S11.** <sup>1</sup>H NMR spectrum of compound **6** measured in CD<sub>3</sub>OD-*d*<sub>4</sub> at 400 MHz.

Mar24-2021-abeer  
 ABEER A-COMP 2  
 DEPTQ-BSU MeOD {C:\data} abeer 23

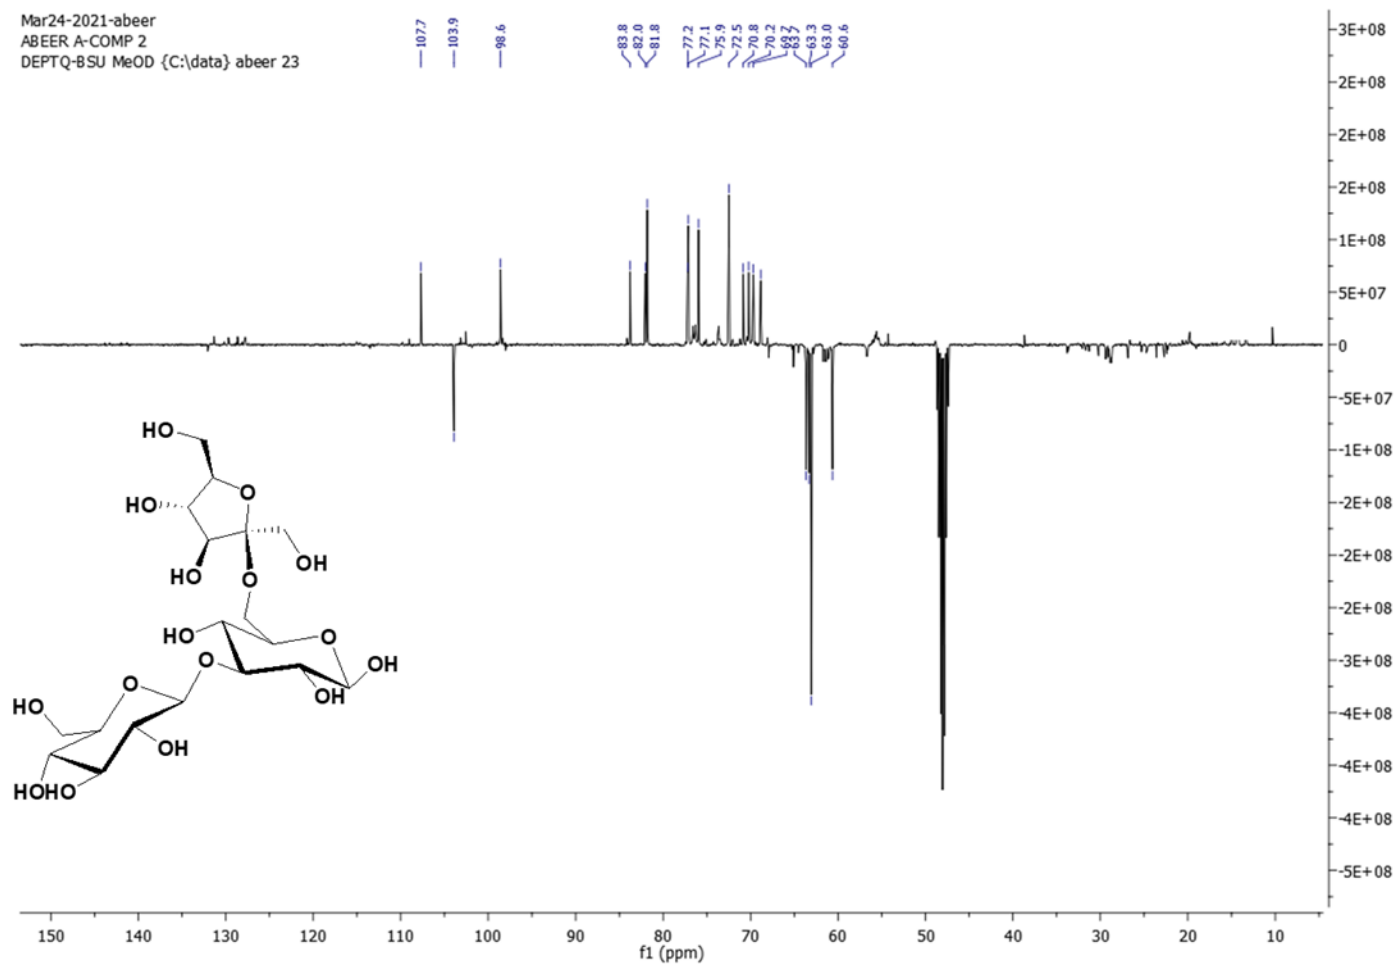

**Figure S12.** DEPT-Q NMR spectrum of compound **6** measured in  $\text{CD}_3\text{OD}-d_4$  at 100 MHz.

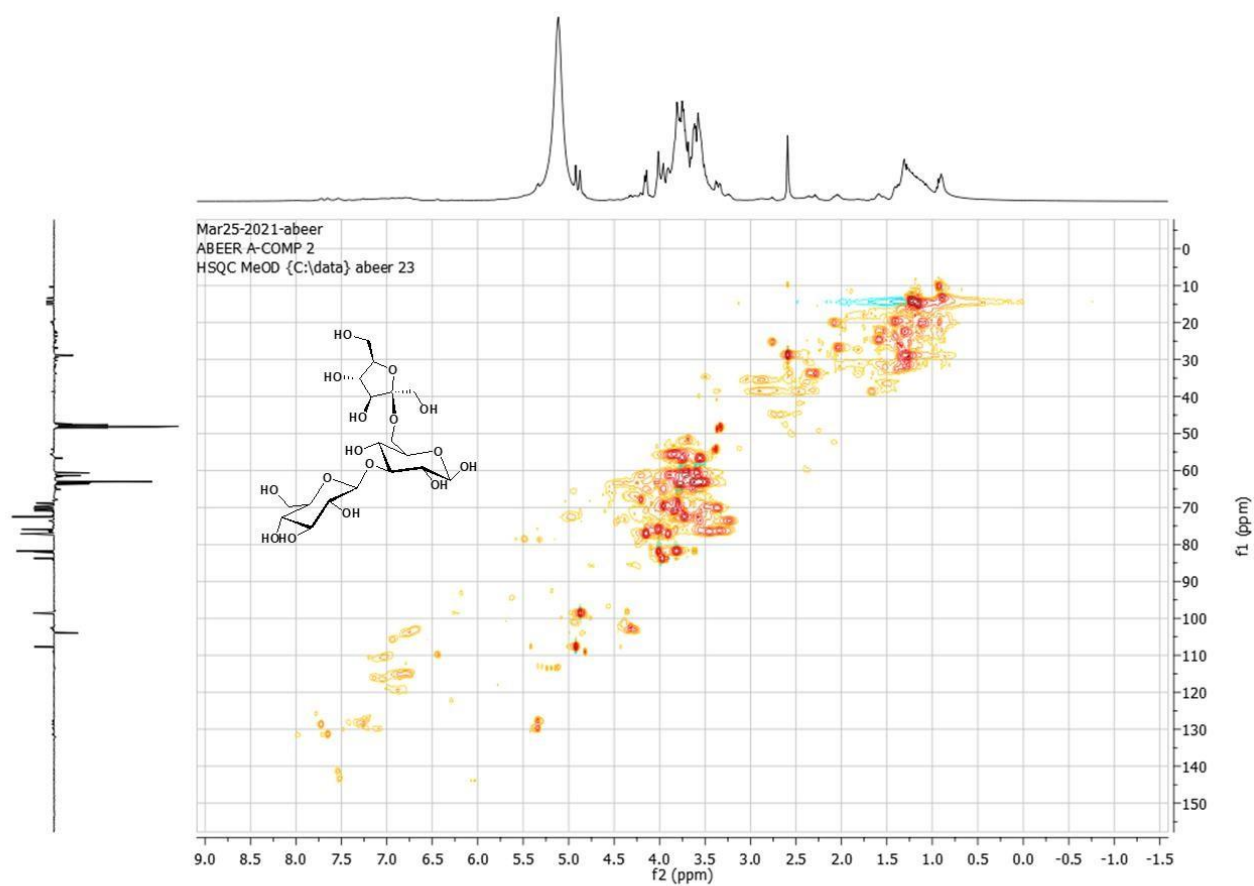

**Figure S13.** HSQC spectrum of compound **6** measured in  $\text{CD}_3\text{OD}-d_4$ .

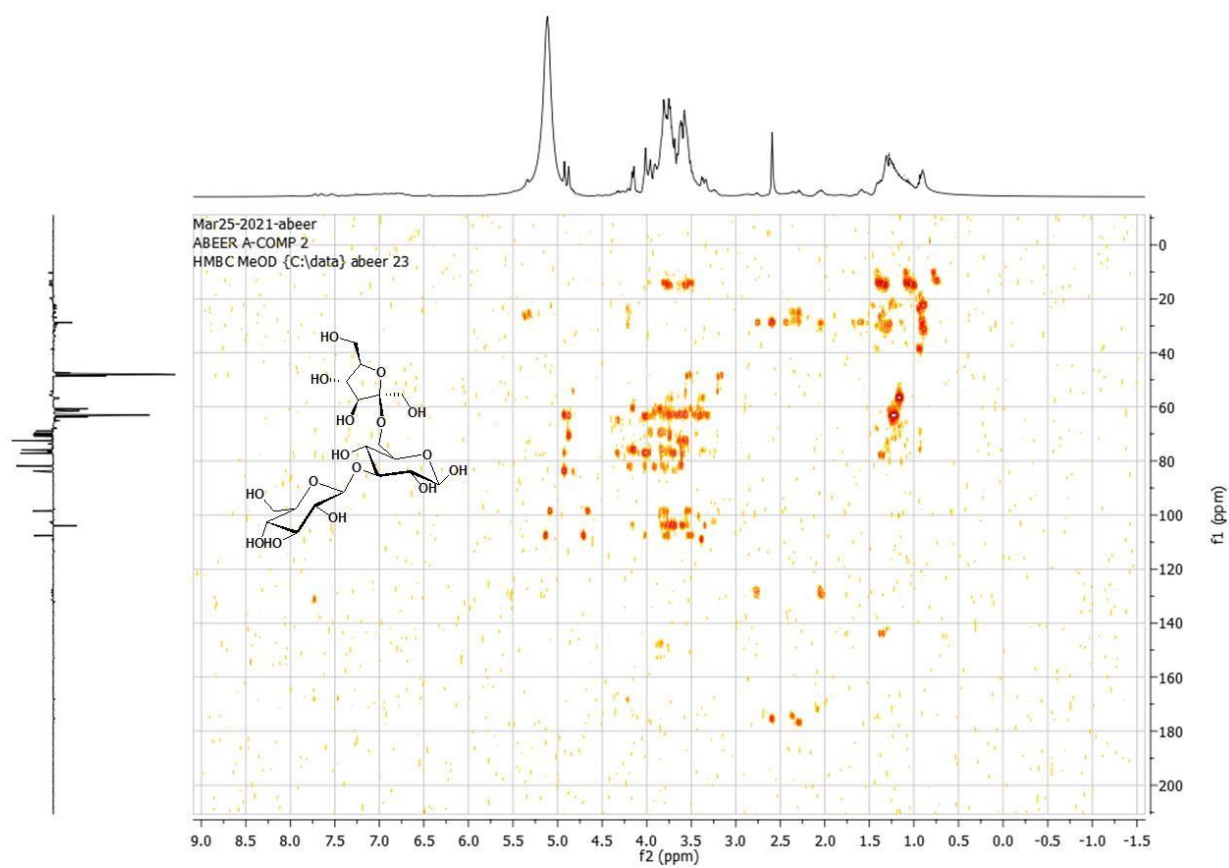

**Figure S14.** HMBC spectrum of compound **6** measured in  $\text{CD}_3\text{OD}-d_4$ .

Apr21-2021-abeer  
 ABEER-COMP 4  
 PROTON\_BSU MeOD {C:\data} abeer 9

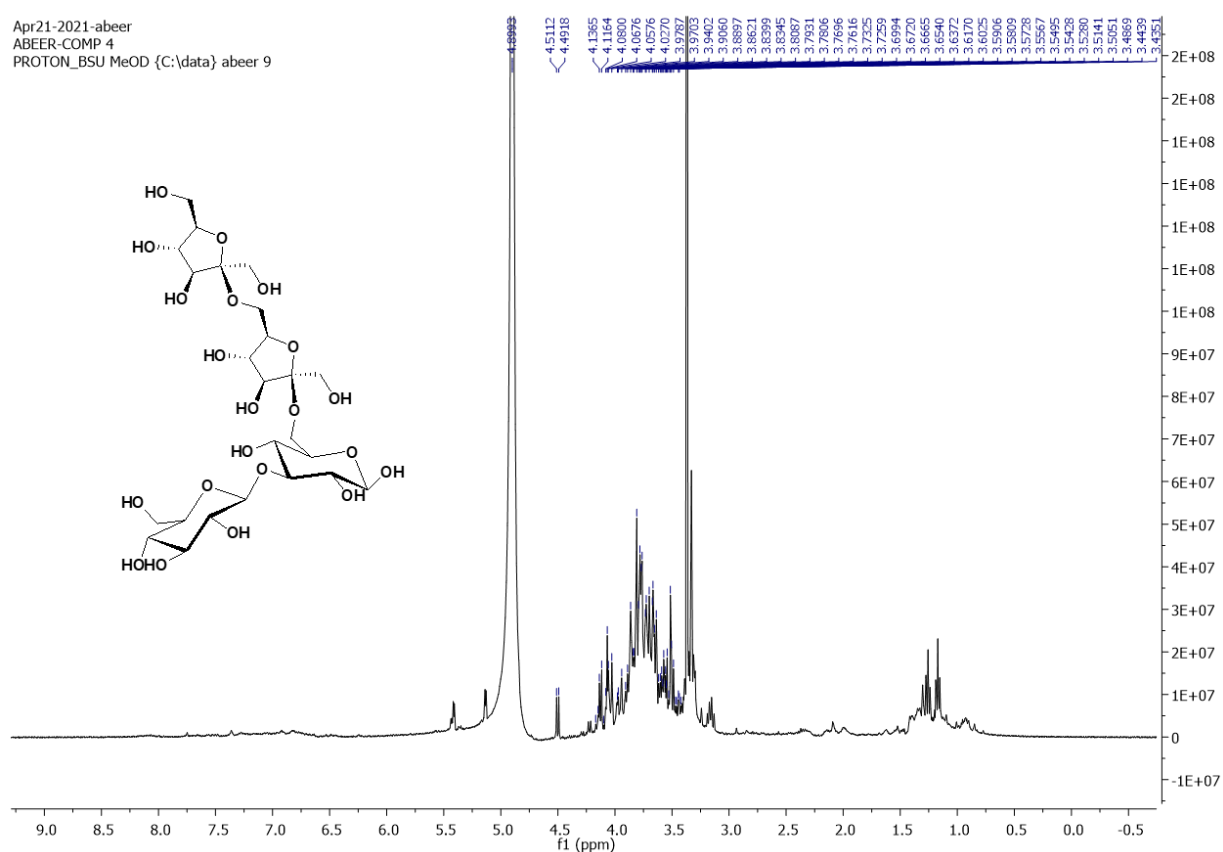

**Figure S15.** 1H NMR spectrum of compound **7** measured in CD<sub>3</sub>OD-*d*<sub>4</sub> at 400 MHz.

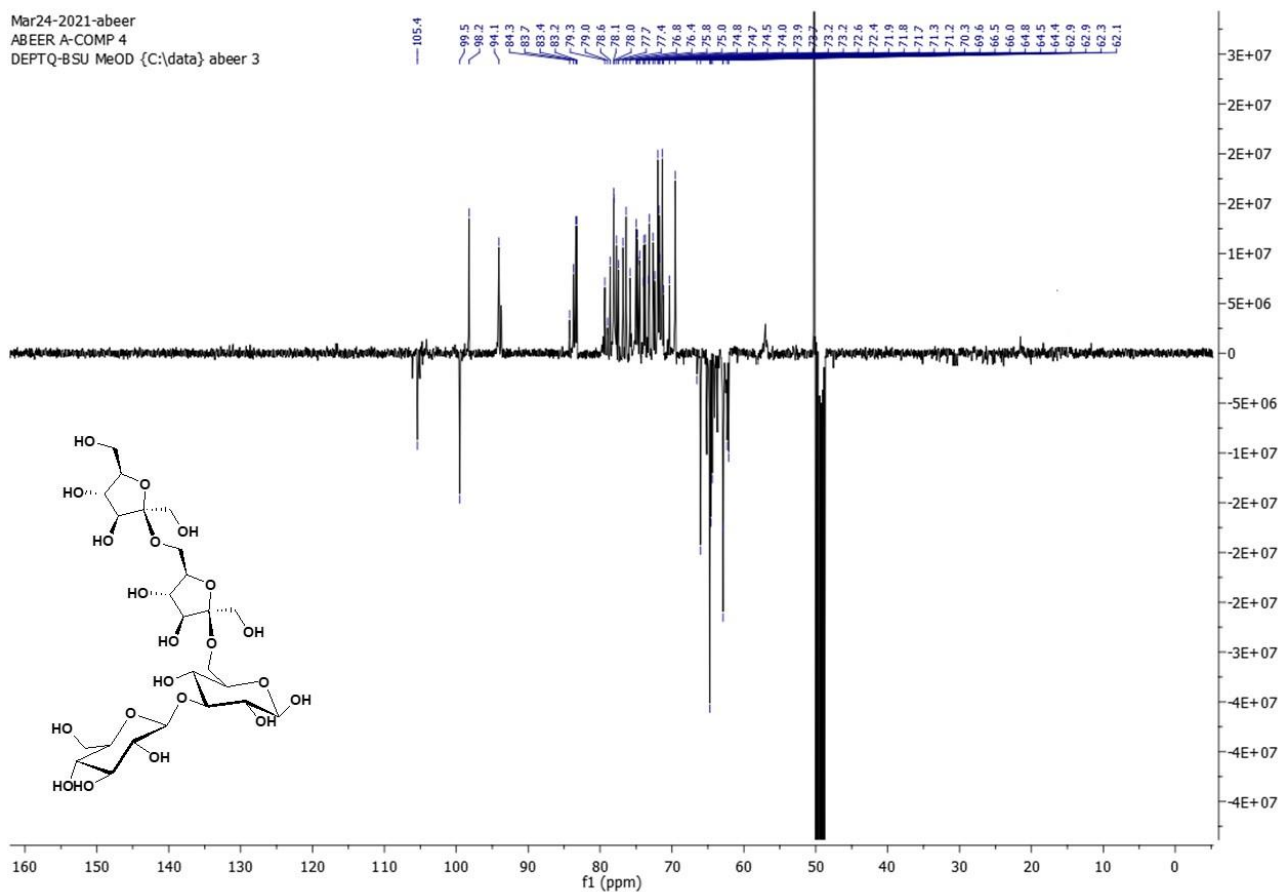

**Figure S16.** DEPT-Q NMR spectrum of compound 7 measured in CD<sub>3</sub>OD-*d*<sub>4</sub> at 100 MHz.



Mar24-2021-abeer  
ABEER A-COMP 6  
PROTON\_BSU DMSO {C:\data\} abeer 9

Chemical structure: CCCCCCCCC/C=C\CCCCCCCCOC(=O)COC(O)CO

Peak list (ppm): 5.29, 4.75, 4.12, 4.02, 3.95, 3.94, 3.91, 3.66, 3.63, 3.46, 3.44, 3.38, 3.32, 3.27, 3.26, 2.76, 2.74, 2.01, 2.00, 1.98, 1.52, 1.26, 0.85.

17

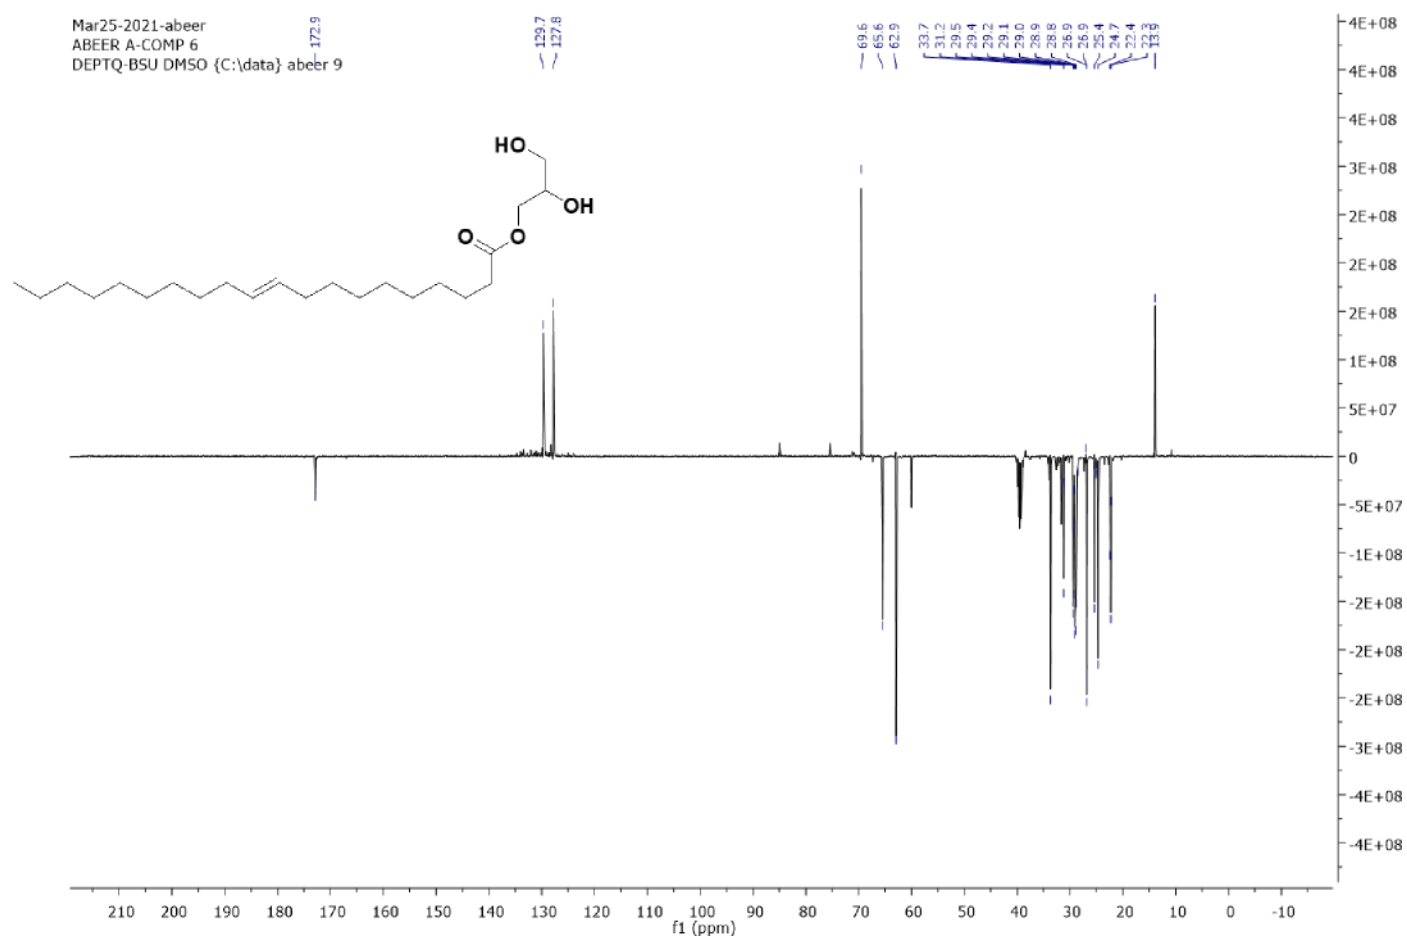

**Figure S18.** DEPT-Q NMR spectrum of compound **8** measured in DMSO-*d*<sub>6</sub> at 100 MHz.

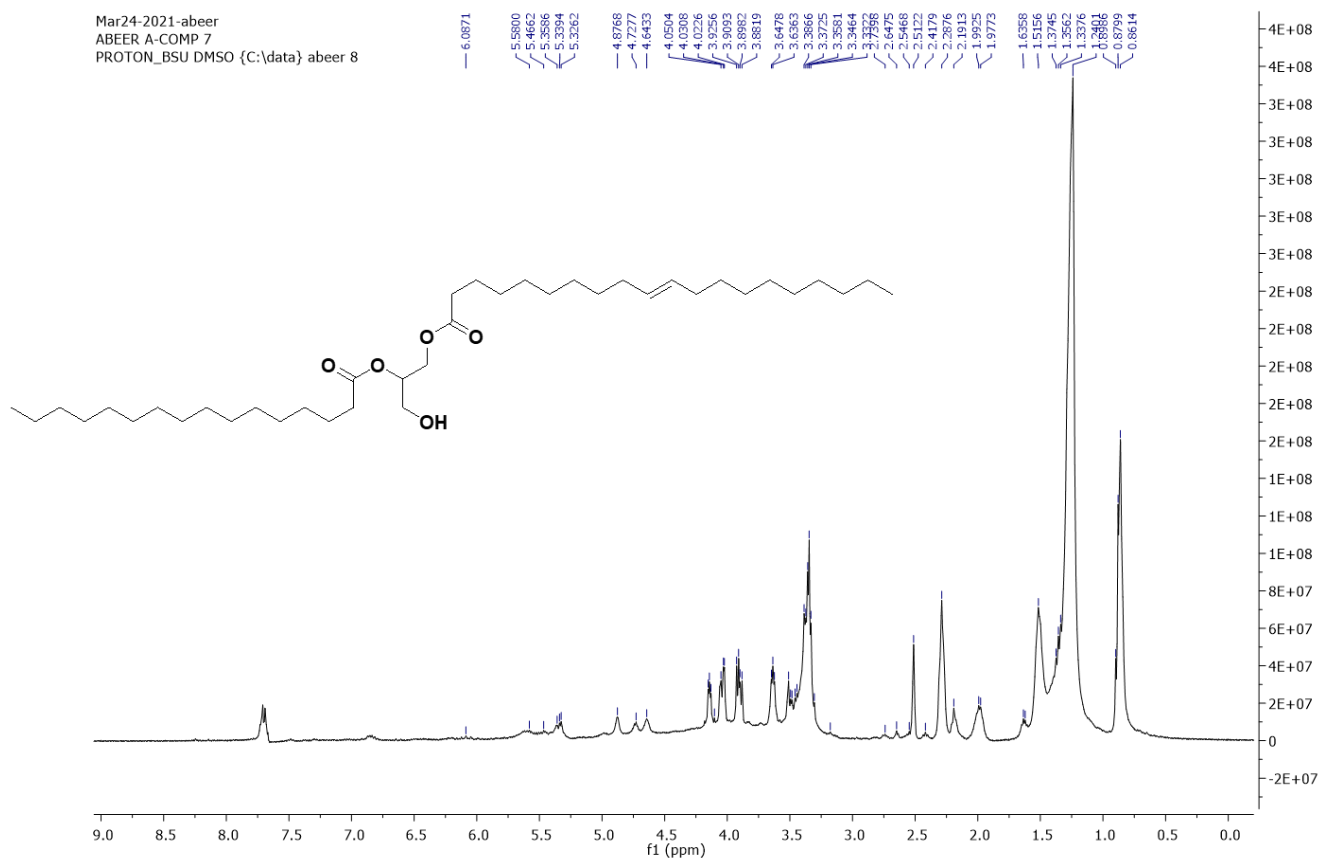

**Figure S19.**  $^1\text{H}$  NMR spectrum of compound **9** measured in  $\text{DMSO}-d_6$  at 400 MHz.

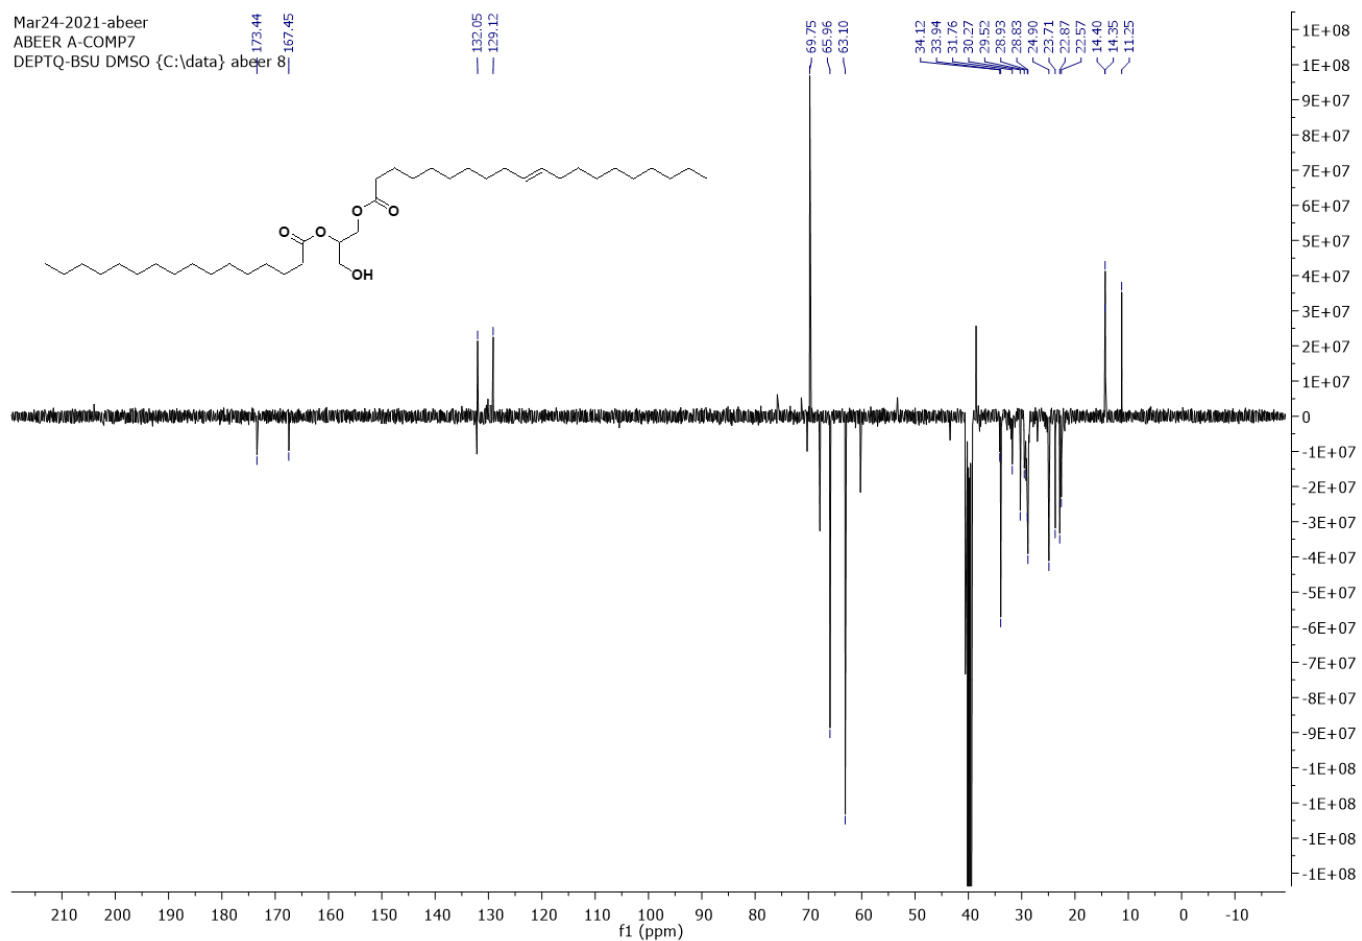

**Figure S20.** DEPT-Q NMR spectrum of compound **9** measured in DMSO- $d_6$  at 100 MHz.

Mar31-2021-abeer  
 ABEER-COMP 10  
 PROTON\_BSU DMSO {C:\data} abeer 22

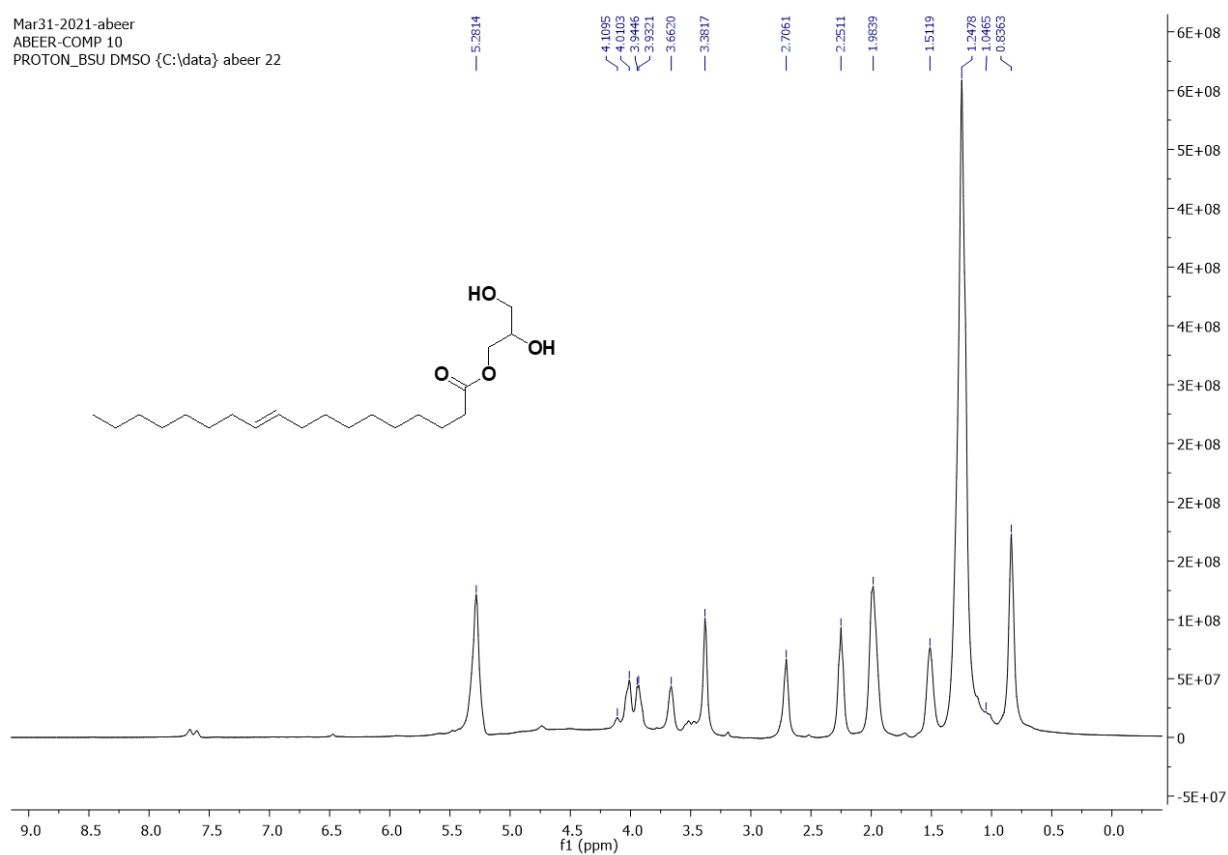

**Figure S21.**  $^1\text{H}$  NMR spectrum of compound **10** measured in  $\text{DMSO}-d_6$  at 400 MHz.

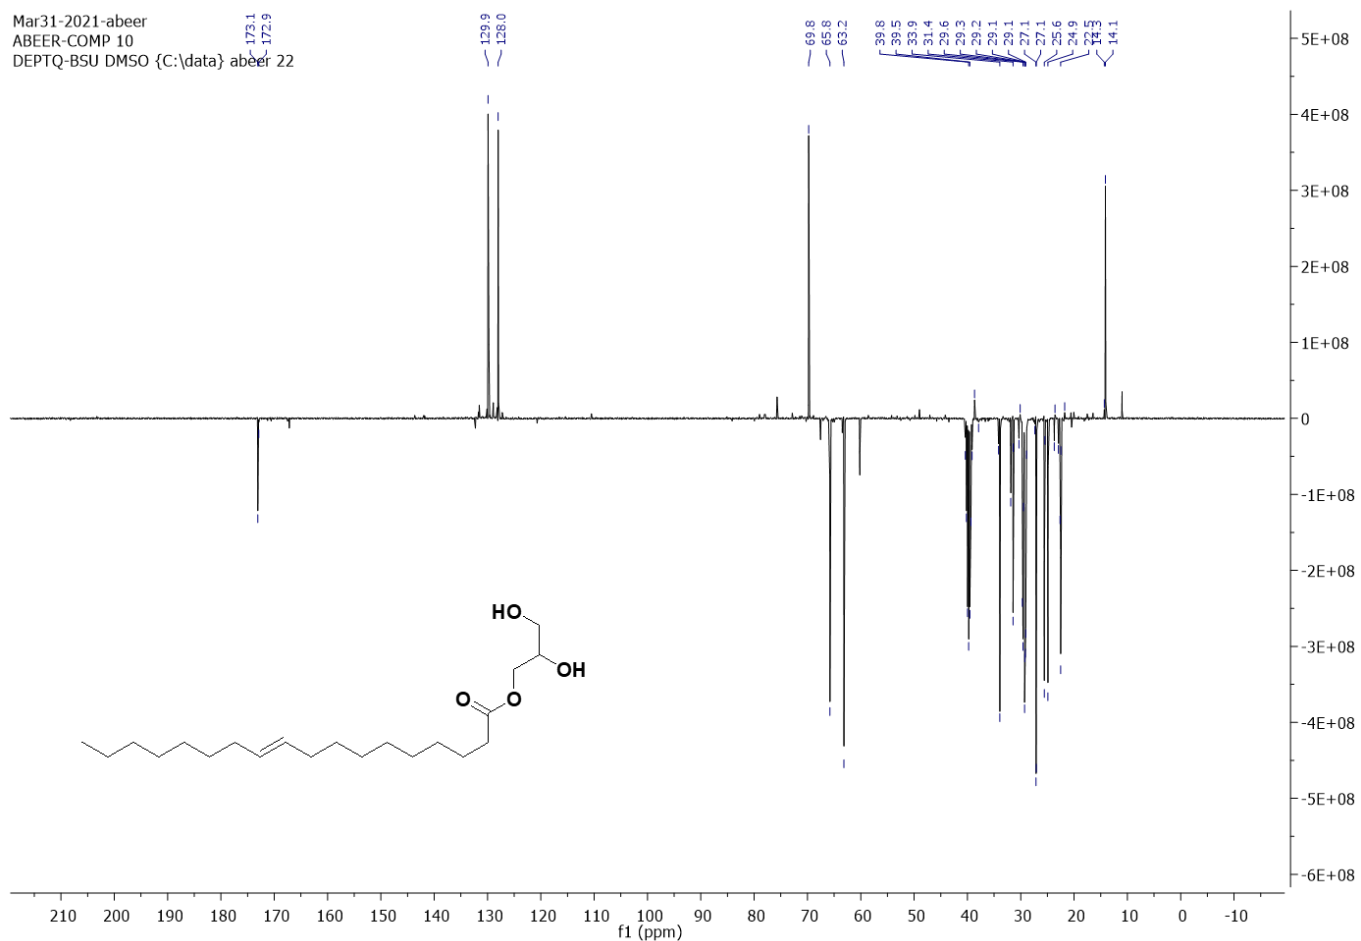

**Figure S22.** DEPT-Q NMR spectrum of compound **10** measured in DMSO-*d*<sub>6</sub> at 100 MHz.

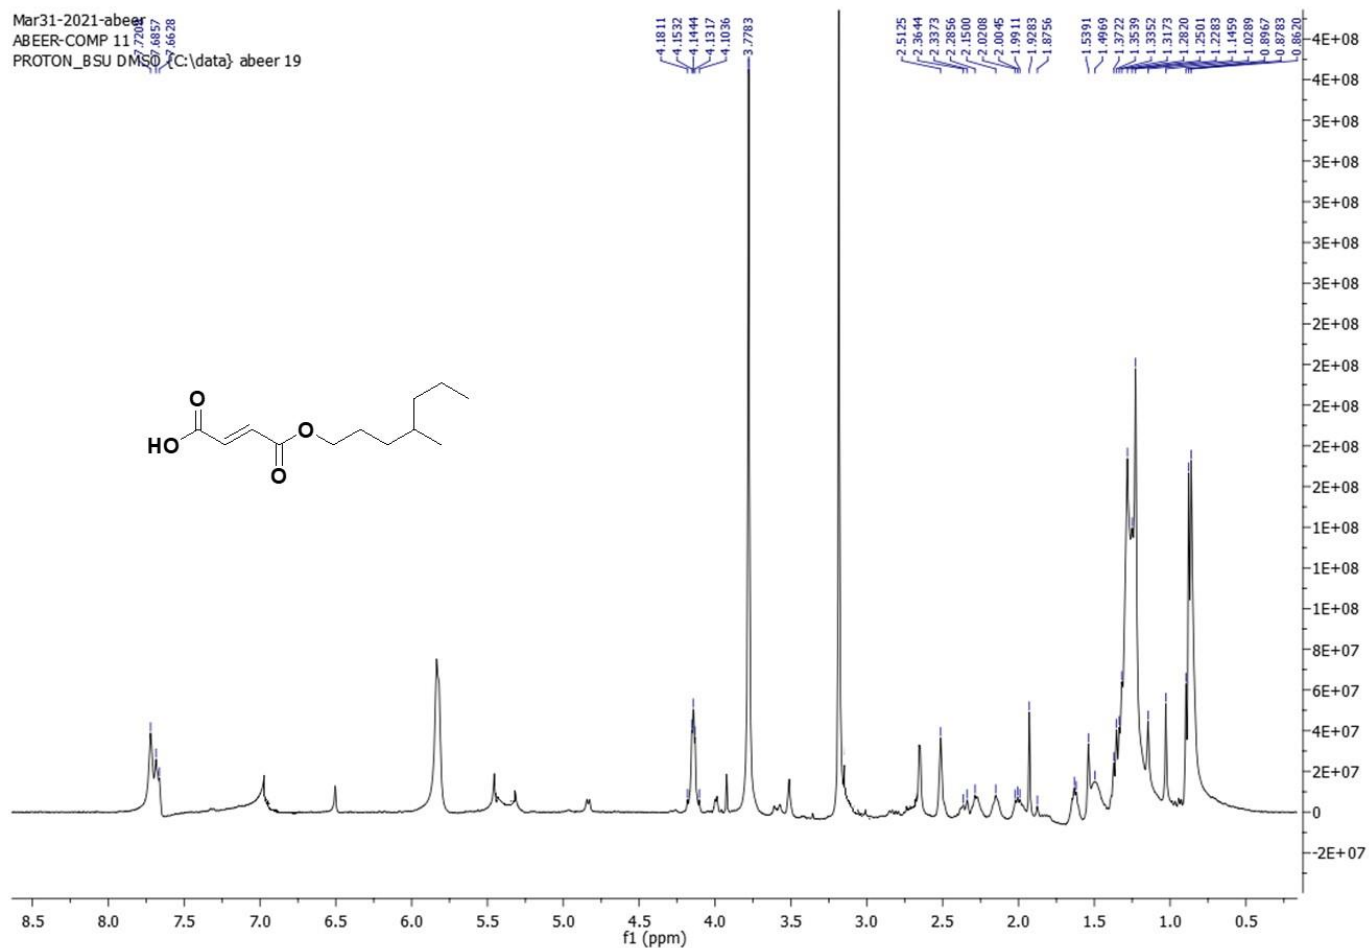

**Figure S23.**  $^1\text{H}$  NMR spectrum of compound **11** measured in  $\text{DMSO}-d_6$  at 400 MHz.

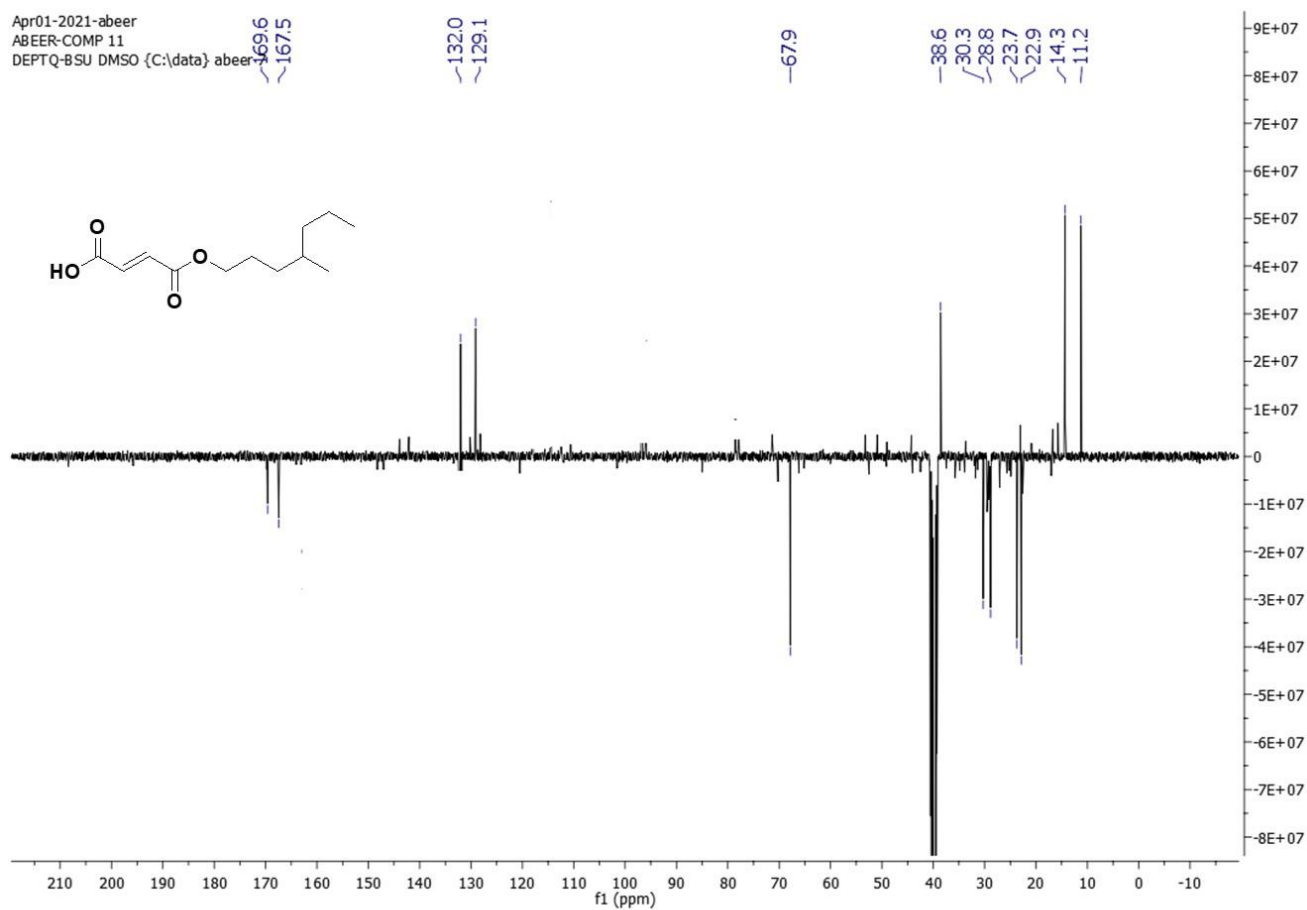

**Figure S24.** DEPT-Q NMR spectrum of compound **11** measured in DMSO- $d_6$  at 100 MHz.



Mar25-2021-abeer  
ABEER A-COMP 9  
PROTON\_BSU DMSO {C:\data\abeer 16

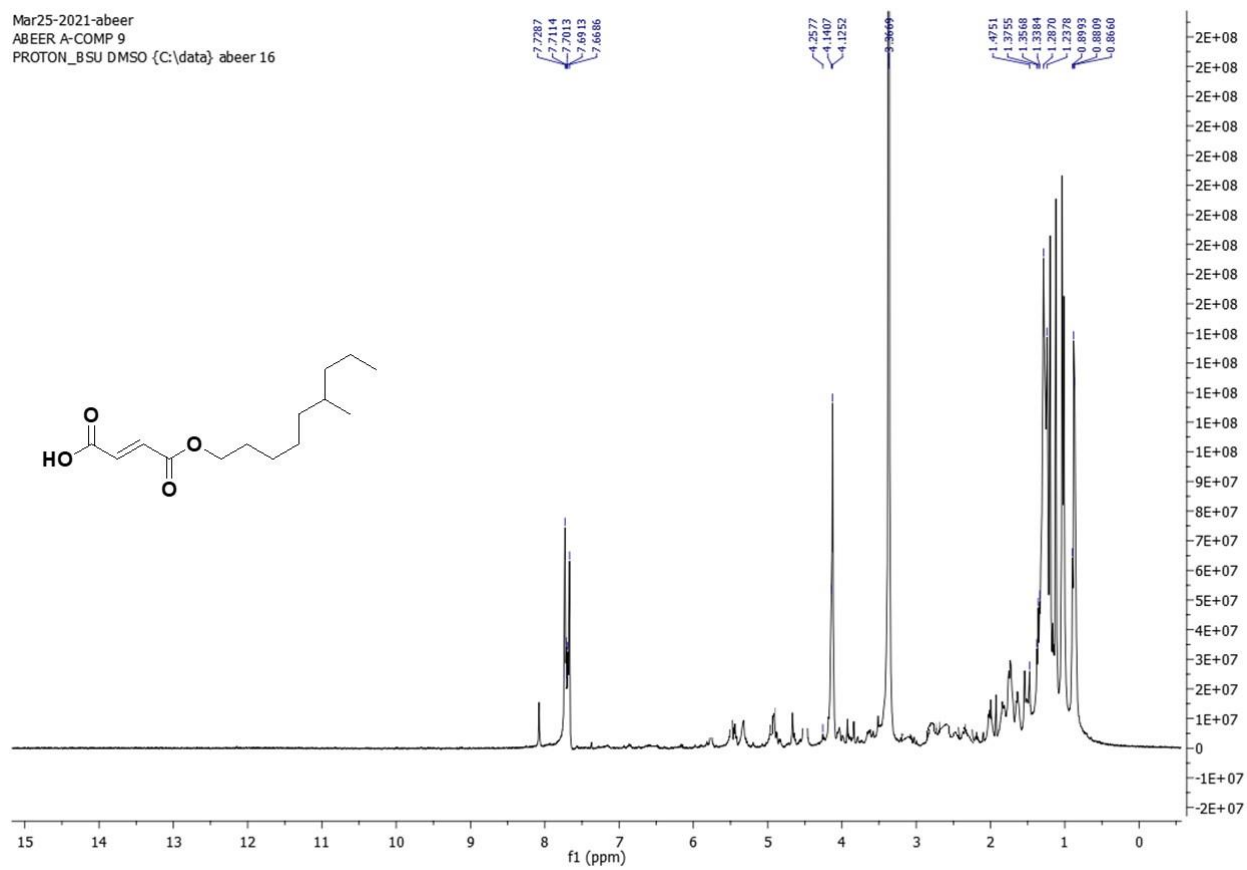

**Figure S25.** <sup>1</sup>H NMR spectrum of compound **12** measured in CDCl<sub>3</sub>-d at 400 MHz.

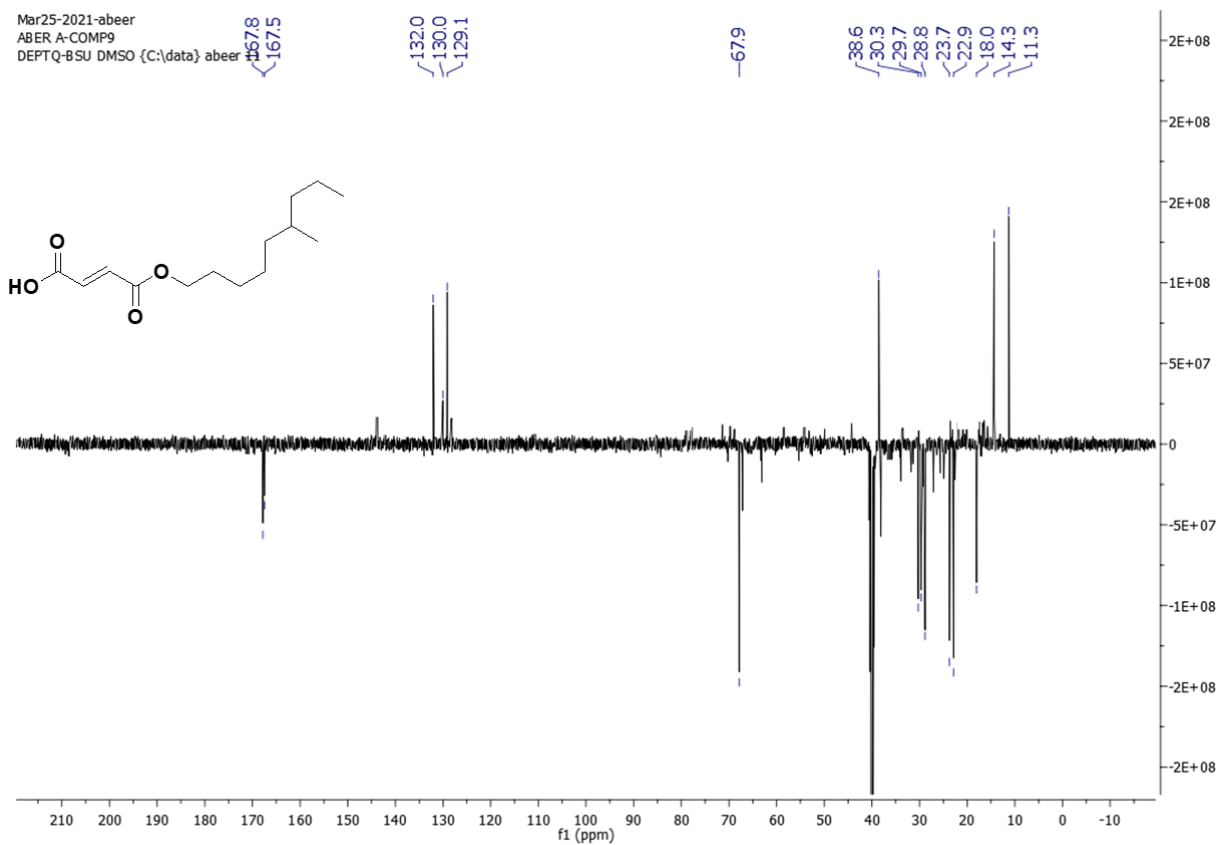

**Figure S26.** DEPT-Q NMR spectrum of compound **12** measured in  $\text{CDCl}_3-d$  at 100 MHz.
